# Supplementary material
Source: HighWire-hosted journal article supplement (https://cmaj.ca/highwire/filestream/70124/field_highwire_adjunct_files/1/170830-res-2-at.pdf)
Supplement: 170830-res-2-at.pdf [file 170830-res-2-at.pdf]

**Appendix 2 (as supplied by the authors): Patients with hip fracture by time of presentation, admission and surgery**

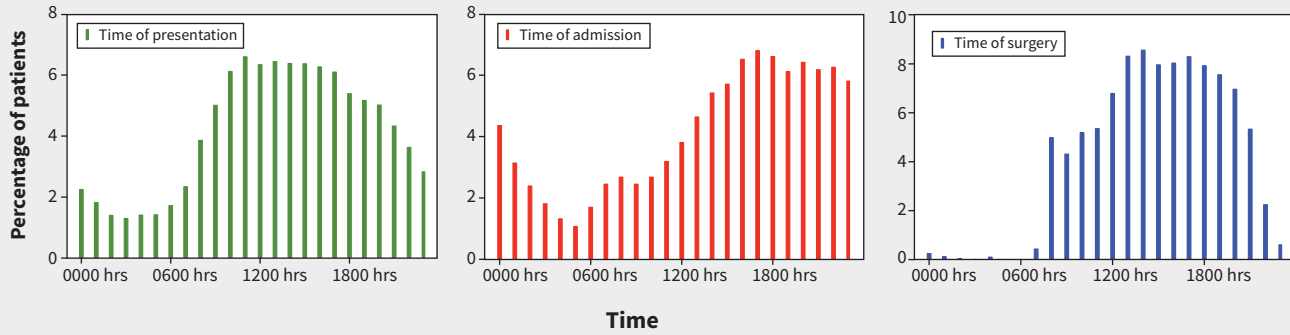

Percentage of patients with hip fracture by time of presentation, admission and surgery. Only 441 patients (1%) received surgery overnight. This may be responsible for the sinusoidal distribution illustrated in Figure 1 of the article.
